# Supplementary material for: The heterochromatic chromosome caps in great apes impact telomere metabolism
Source: PubMed Central journal article supplement — Nucleic Acids Res. 2013 Mar 20;41(9):4792–801. doi: 10.1093/nar/gkt169 (PMC3643582; doi:10.1093/nar/gkt169), 2013-03-20

## Supplementary Table S1

|     | IMR90 | Chimpanzee |
|-----|-------|------------|
| 1p  | 2,454 | 2,85       |
| 1q  | 2,708 | 2,84       |
| 2p  | 4,450 | 4,11       |
| 2q  | 3,157 | 3,30       |
| 3p  | 4,125 | 3,50       |
| 3q  | 2,338 | 2,96       |
| 4p  | 3,765 | 3,75       |
| 4q  | 4,451 | 3,52       |
| 5p  | 2,694 | 3,66       |
| 5q  | 3,771 | 2,88       |
| 6p  | 3,334 | 3,72       |
| 6q  | 4,152 | 3,18       |
| 7p  | 2,402 | 4,22       |
| 7q  | 4,210 | 3,06       |
| 8p  | 3,719 | 4,40       |
| 8q  | 3,176 | 2,91       |
| 9p  | 2,484 | 4,14       |
| 9q  | 3,206 | 4,44       |
| 10p | 2,757 | 3,93       |
| 10q | 4,028 | 3,39       |
| 11p | 2,533 | 4,55       |
| 11q | 4,240 | 4,39       |
| 12p | 2,442 | 3,97       |
| 12q | 3,564 | 3,46       |
| 16p | 2,530 | 4,25       |
| 16q | 2,976 | 4,45       |
| 17p | 2,783 | 4,72       |
| 17q | 2,114 | 4,58       |
| 18p | 3,443 | 4,13       |
| 18q | 2,566 | 3,53       |
| 19p | 2,663 | 4,04       |
| 19q | 2,334 | 4,27       |
| 20p | 3,737 | 4,20       |
| 20q | 2,687 | 4,34       |
| Xp  | 2,975 | 4,34       |
| Xq  | 3,528 | 3,45       |

Mean replication timings ( $\Sigma$  (% of telomeres replicating in pulse n multiplied by n)/total number of n) and divided by 6 (the total number of pulses analyzed) as determined by the ReD-FISH approach for chimpanzee telomeres (this manuscript) and for human telomeres (1) in fibroblast cells. Human acrocentric chromosomes were considered in groups D and G in (1) and therefore individual values were not available for comparison.

1. Arnoult, N., Schluth-Bolard, C., Letessier, A., Drascovic, I., Bouarich-Bourimi, R., Campisi, J., Kim, S.H., Boussouar, A., Ottaviani, A., Magdinier, F. *et al.* (2010) Replication timing of human telomeres is chromosome arm-specific, influenced by subtelomeric structures and connected to nuclear localization. *PLoS Genet*, **6**, e1000920.

Figure S1

A LNA (G-rich) probe

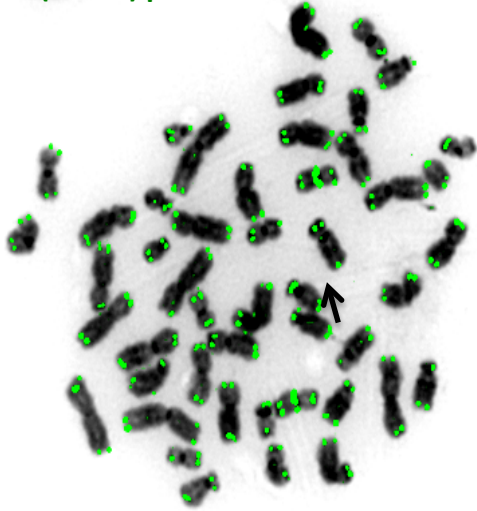

B PNA (C-rich) probe

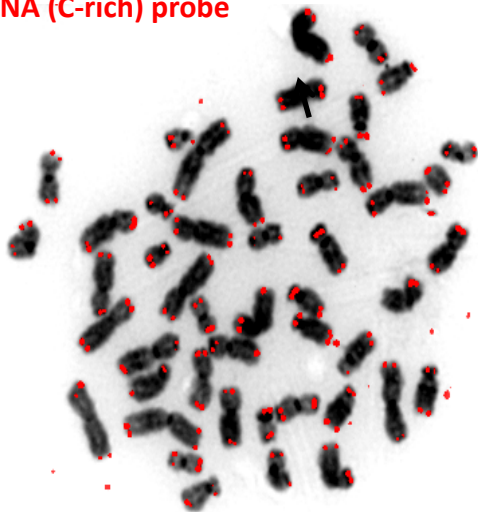

C

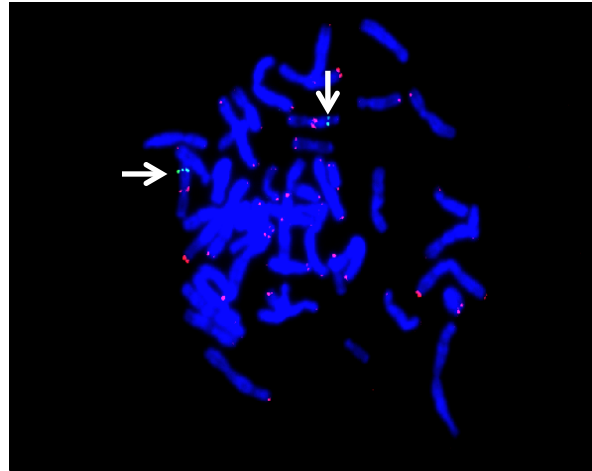

D

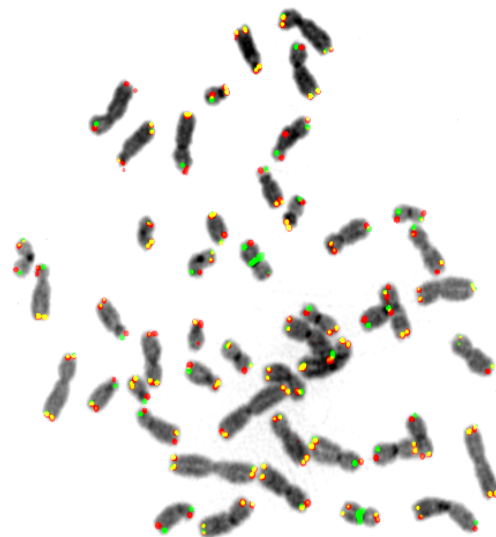

Figure S2

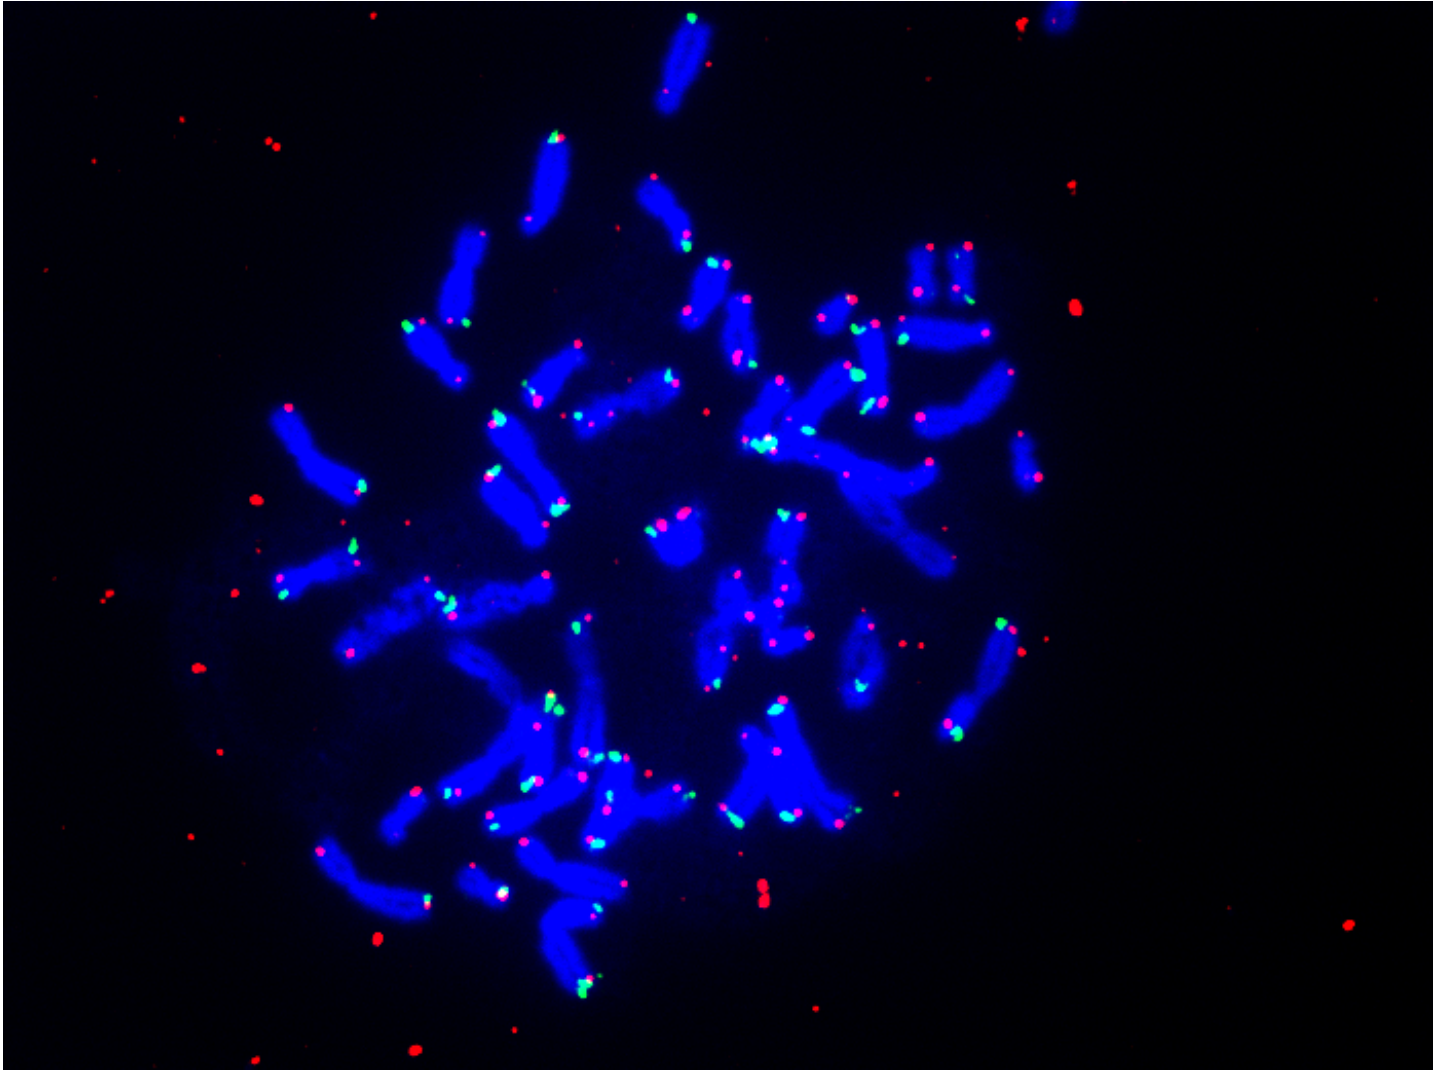

Figure S3

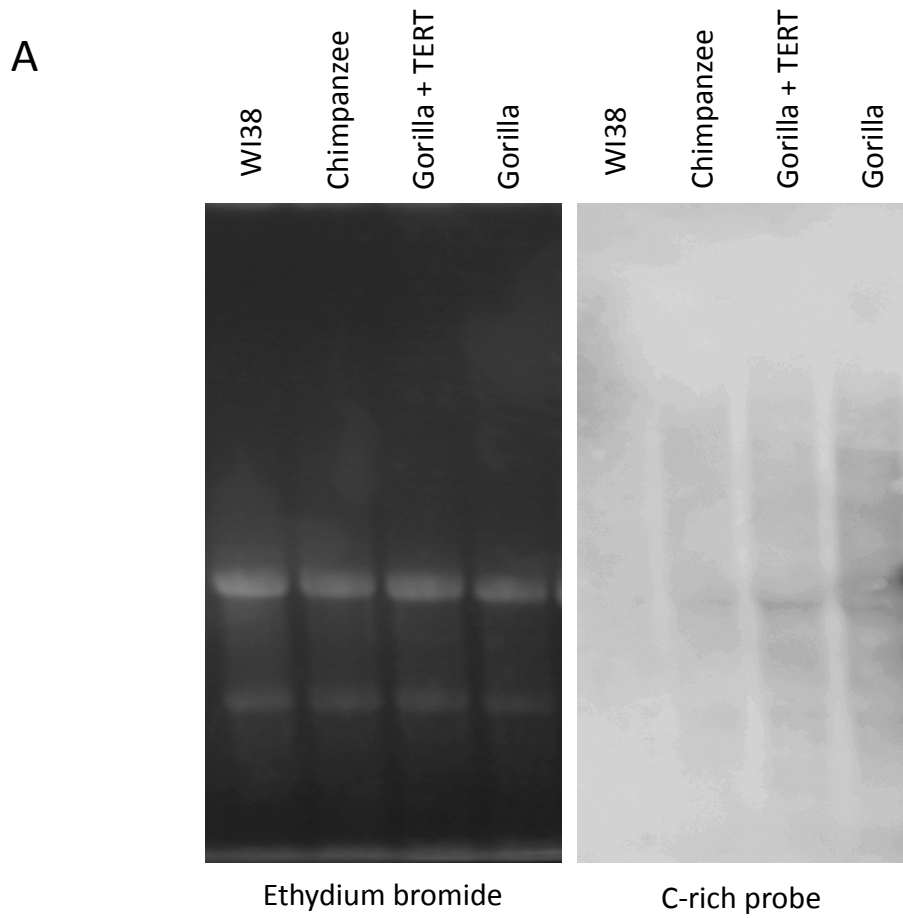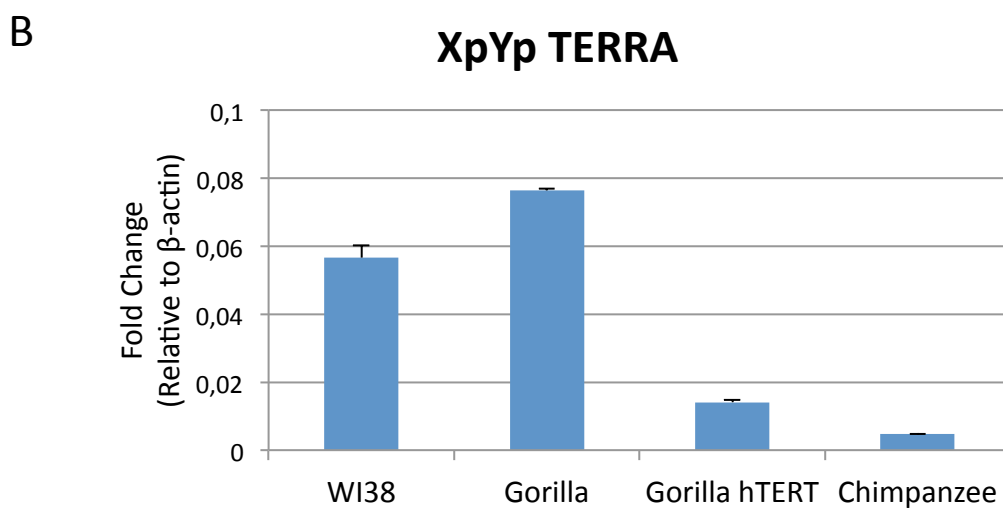

Figure S4

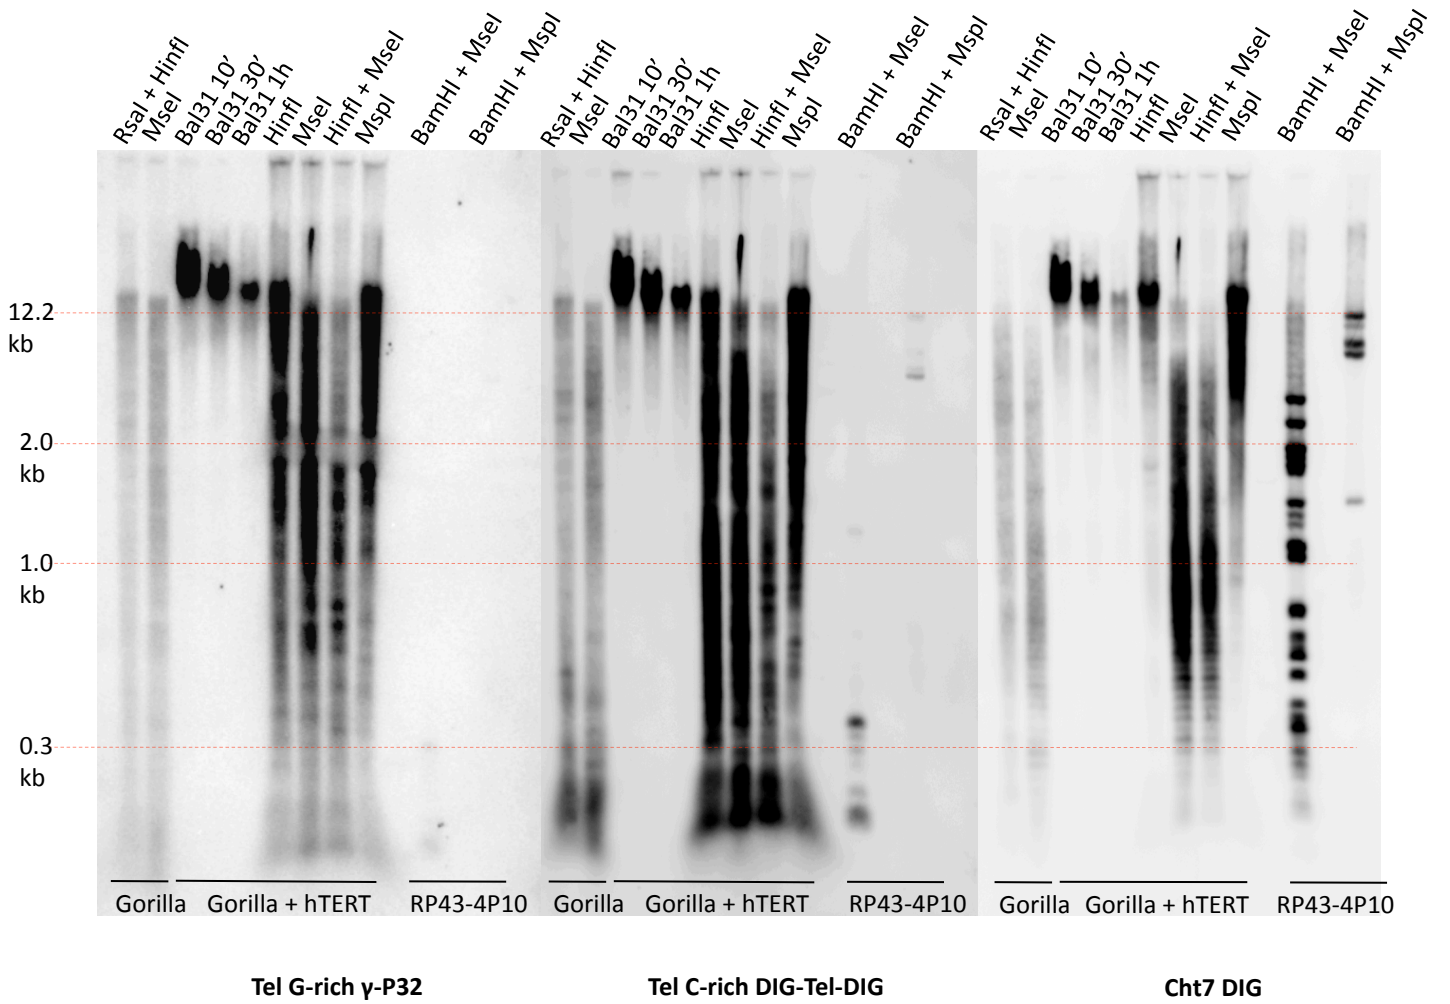

Supplement: supp_gkt169_nar-00150-v-2013-File008.pdf [file supp_gkt169_nar-00150-v-2013-File008.pdf]
